# Supplementary material for: Redox reactions between acetonitrile and nitrogen dioxide in the interlayer space of fluorinated graphite matrices
Source: Royal Society of Chemistry journal article supplement (doi:10.1039/d0cp06412b), 2021-01-01
Supplement: d0cp06412b1.pdf [file d0cp06412b1.pdf]

Supporting information for

**Redox reactions between acetonitrile and nitrogen dioxide in interlayer space of fluorinated graphite matrices**

D. V. Pinakov,<sup>a</sup> V. G. Makotchenko,<sup>a</sup> G. I. Semushkina,<sup>a</sup> G. N. Chekhova,<sup>a</sup> I. P. Prosvirin,<sup>b</sup> I. P. Asanov,<sup>a</sup> Yu. V. Fedoseeva,<sup>a</sup> A. A. Makarova,<sup>c</sup> Yu. V. Shubin,<sup>a</sup> A. V. Okotrub<sup>a</sup> and L. G. Bulusheva<sup>1a</sup>

<sup>a</sup>Nikolaev Institute of Inorganic Chemistry SB RAS, 3 Acad. Lavrentiev Ave., 630090 Novosibirsk, Russia

<sup>b</sup>Boriskov Institute of Catalysis SB RAS, 5 Acad. Lavrentiev Ave., 630090 Novosibirsk, Russia

<sup>c</sup>Physikalische Chemie, Institut für Chemie und Biochemie, Freie Universität Berlin, 14195 Berlin, Germany

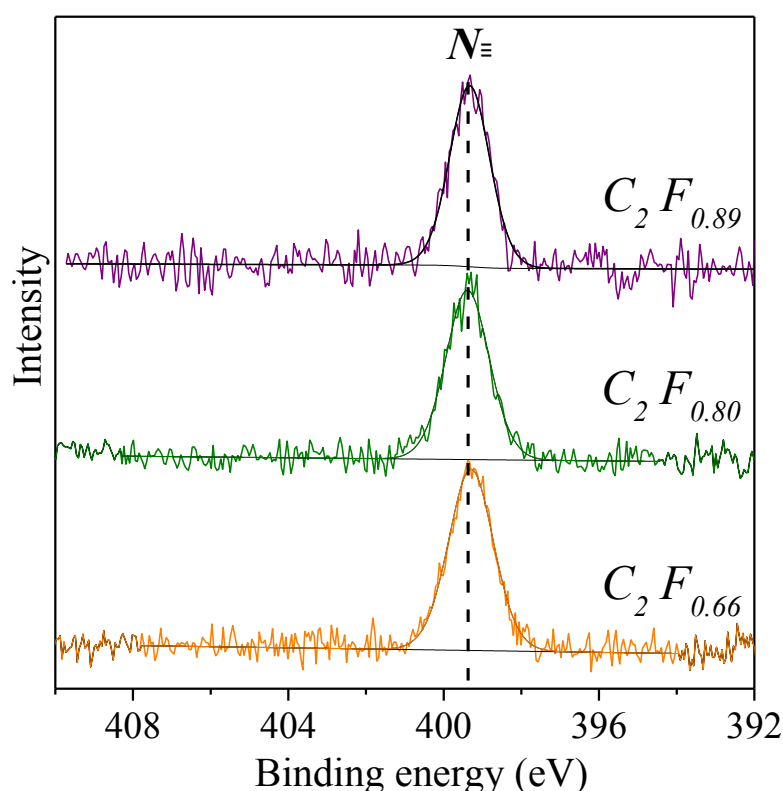

Fig. S1. XPS N 1s-spectra of fluorinated graphite intercalation compounds (FGICs) based on various  $C_2F_x$  matrices with acetonitrile.

<sup>1</sup>Corresponding author e-mail: bul@niic.nsc.ru

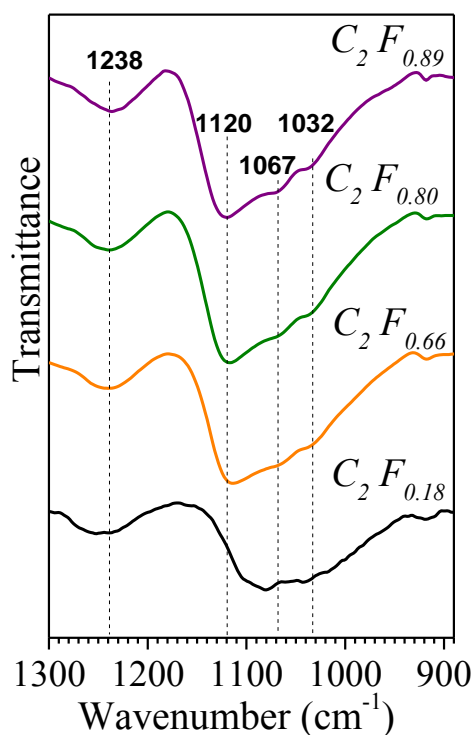

Fig. S2. C-F vibration region of IR-spectra of FGICs based on various  $C_2F_x$  matrices with acetonitrile. Bold numbers from lowest to highest identify frequencies of the stretching vibrations for isolated CF groups and CF groups with two, one, and no bare carbon neighbors, respectively.

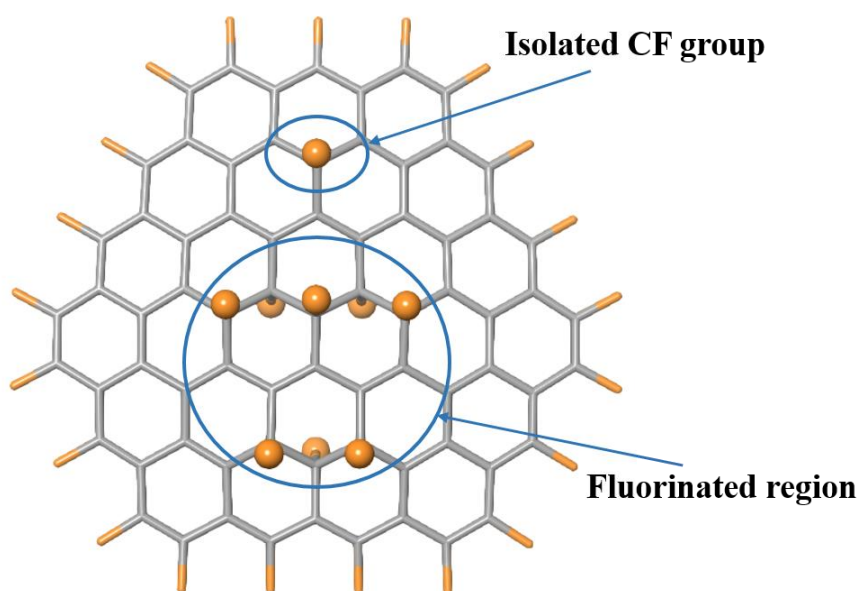

Fig. S3. Model of partially fluorinated graphene layer with isolated CF group and fluorinated region of zigzag CF chains separated by bare carbon atoms. The fragment edges are terminated by fluorine atoms.

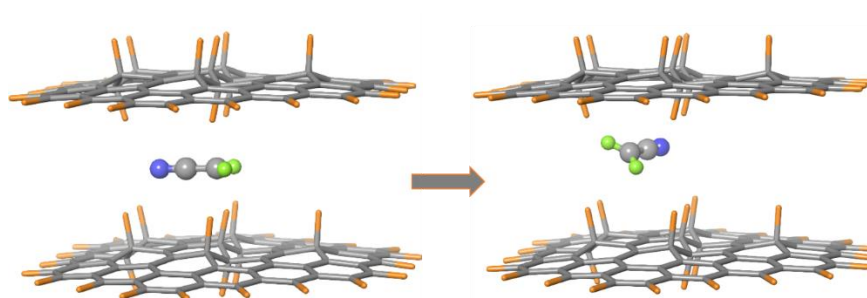

Fig. S4. Model of partially fluorinated graphene bilayer intercalated with  $\text{CH}_2\text{CN}$ . Left – starting position of  $\text{CH}_2\text{CN}$  between fluorinated regions of the layers. Right – the structure of model optimized at B3LYP/6-31G.  $\text{CH}_2\text{CN}$  rotated and located over  $\text{sp}^2$ -hybridized carbon chains in the gallery of fluorinated graphene bilayer.
